# Supplementary material for: PACT/PRKRA and p53 regulate transcriptional activity of DMRT1
Source: PubMed Central journal article supplement (PMC7198010; doi:10.1590/1678-4685-gmb-2019-0017), 2020-03-30
Supplement: 1415-4757-GMB-43-2-e20190017-s2.pdf [file 1415-4757-GMB-43-2-e20190017-s2.pdf]

## Supplementary Material to “PACT/PRKRA and p53 regulate transcriptional activity of DMRT1”

**Table S1** - Sequences of oligonucleotide primers used in PCR reaction for cloning.

| construct              | forward primer                           | reverse primer                           |
|------------------------|------------------------------------------|------------------------------------------|
| pMALc2-DMRT1 (130-336) | 5'-CCACTTCAGGATCCACAGCCA-3'              | 5'-aaactcgagCTATTCTCCATTTTCAGCAG-3'      |
| pcDNA3-FLAG-DMRT1      | 5'-aaagatccATGCAAAACAATGAGGAACC-3'       | 5'-aaactcgagCTATTCTCCATTTTCAGCAG-3'      |
| pcDNA3-S-PRKRA         | 5'-aaaagcttTCCCAGGAGAGGTTTCCAG-3'        | 5'-aaactcgagTCACTTTTTAATACACATGATTTTA-3' |
| pcDNA3-S-PHB2          | 5'-aaagaattcgGCTCAGAATTTAAAGGATTTTGC-3'  | 5'-aaactcgagTCACTTCTTTCCTTGTTTGAAAAC-3'  |
| pcDNA3-EGFP-PHB2       | 5'-aaagaattcATGGCTCGAATTTAAAGGA-3'       | 5'-aaactcgagCACTTCTTTCCTTGTTTGAAAAC-3'   |
| pcDNA3-EGFP-CACTTCTTT  | 5'-aaagaattcATGAAAGAGTCCGTATTTACAGTGG-3' | 5'-aaactcgagCACTTCTTTCCTTGTTTGAAAAC-3'   |
| pcDNA3-S-FLOT2         | 5'-aaacaattcGGGGAAGTCCATACAGTGG-3'       | 5'-aaactcgagTTACGCCATGATGCCTGTG-3'       |
| pcDNA3-S-PKR           | 5'-aaagatccATGGATGATCTGAATGTCAAAG-3'     | 5'-aaaactcgagTTAATGGGTTTTTGAGTCCAAG-3'   |
| pcDNA3-FLAG-p53        | 5'-ATGGAACCTTCTCTGAGAC-3'                | 5'-TCATTCCGAGTCGGGCTGTTC-3'              |
